# Supplementary material
Source: Research Square preprint supplement (doi:10.21203/rs.3.rs-9755050/v1)
Supplement: Supplementary file 1 [file 840795ee4ff5065560712e9d.docx]

Figure. S1. Screenshot of the point cloud exported from the Wheat_demo2 in this study.

Movie. S1. Wheat_demo2.mp4.

**Supplementary Model Parameter Configurations**

*Direct3D, Real3D, SF3D, SPAR3D, and TRELLIS.2*

# Table S1. Overview of Compared Single View 3D Reconstruction Methods

| **Method** | **Official source** | **Technical route** | **Default output used by code** | **Main evidence** |
| --- | --- | --- | --- | --- |
| Direct3D | DreamTechAI/Direct3D | Native 3D latent diffusion with D3D VAE and D3D DiT | Input image to mesh; example exports OBJ | Official README and HF config |
| Real3D | hwjiang1510/Real3D | Large Reconstruction Model based on TripoSR style triplane NeRF renderer | Input image to scene code, rendered views, mesh export in code | Official README, checkpoint config, run.py |
| SF3D | Stability-AI/stable-fast-3d | Fast feed forward textured mesh reconstruction based on TripoSR with UV unwrapping and material prediction | GLB textured mesh | Official README, run.py, HF model card |
| SPAR3D | Stability-AI/stable-point-aware-3d | Point aware reconstruction with intermediate point cloud conditioning and mesh generation | GLB mesh plus points.ply | Official README, run.py, HF model card |
| TRELLIS.2 | microsoft/TRELLIS.2 | 4B image to 3D model using O Voxel and sparse compression VAE | PBR textured GLB mesh | Official README, example.py, app.py, HF model card |

# Table S2. Direct3D Default Configuration

| **Category** | **Parameter** | **Default value / setting** | **Evidence** |
| --- | --- | --- | --- |
| General | Pretrained model | DreamTechAI/Direct3D | Official README usage |
| General | Main components | D3D VAE and D3D DiT | Official README describes the two components |
| VAE | Target module | direct3d.models.vae.D3D_VAE | HF config.yaml |
| VAE | Triplane resolution | 32 | HF config.yaml |
| VAE | Triplane feature dimension | 32 | HF config.yaml |
| VAE | Latent dimension | 16 | HF config.yaml |
| VAE | Fourier frequency bands | 8 | HF config.yaml |
| VAE | Attention heads | 12 | HF config.yaml |
| VAE | Attention head dimension | 64 | HF config.yaml |
| VAE | Encoder layers | 8 | HF config.yaml |
| VAE | Geometry decoder layers | 5 | HF config.yaml |
| VAE | Latent scale | 2.45 | HF config.yaml |
| DiT | Target module | direct3d.models.dit.D3D_DiT | HF config.yaml |
| DiT | Input channels | 16 | HF config.yaml |
| DiT | Output channels | 16 | HF config.yaml |
| DiT | Transformer layers | 44 | HF config.yaml |
| DiT | Attention heads | 16 | HF config.yaml |
| DiT | Attention head dimension | 72 | HF config.yaml |
| DiT | Attention bias | True | HF config.yaml |
| DiT | Semantic condition channels | 1024 | HF config.yaml |
| DiT | Pixel condition channels | 1024 | HF config.yaml |
| DiT | Patch size | 2 | HF config.yaml |
| DiT | Sample size | [32, 96] | HF config.yaml |
| Conditioning | Semantic encoder | ClipImageEncoder, openai/clip-vit-large-patch14 | HF config.yaml |
| Conditioning | Pixel encoder | DinoEncoder, facebook/dinov2-large | HF config.yaml |
| Scheduler | Scheduler type | EulerAncestralDiscreteScheduler | HF config.yaml |
| Scheduler | Training timesteps | 1000 | HF config.yaml |
| Scheduler | Beta start / beta end | 0.0001 / 0.02 | HF config.yaml |
| Scheduler | Beta schedule | linear | HF config.yaml |
| Scheduler | Prediction type | epsilon | HF config.yaml |
| Inference | Number of inference steps | 50 | Official README usage |
| Inference | Guidance scale | 4.0 | Official README usage |
| Inference | Marching cubes threshold | -1.0 in README example | Official README usage |
| Inference | Background removal | False in README example; True can be set when needed | Official README usage |
| Output | Export format in official example | OBJ | Official README usage |

# Table S3. Real3D Default Configuration

| **Category** | **Parameter** | **Default value / setting** | **Evidence** |
| --- | --- | --- | --- |
| General | Pretrained checkpoint | ./checkpoints/model_both_trained_v1.ckpt | README and run.py |
| General | Base codebase | Developed based on TripoSR | README acknowledgement |
| Input | Conditional image size | 512 | checkpoint/config.yaml |
| Image tokenizer | Class | tsr.models.tokenizers.image.DINOSingleImageTokenizer | checkpoint/config.yaml |
| Image tokenizer | Pretrained backbone | facebook/dino-vitb16 | checkpoint/config.yaml |
| Tokenizer | Class | tsr.models.tokenizers.triplane.Triplane1DTokenizer | checkpoint/config.yaml |
| Tokenizer | Plane size | 32 | checkpoint/config.yaml |
| Tokenizer | Number of channels | 1024 | checkpoint/config.yaml |
| Backbone | Class | tsr.models.transformer.transformer_1d.Transformer1D | checkpoint/config.yaml |
| Backbone | Input channels | ${tokenizer.num_channels} | checkpoint/config.yaml |
| Backbone | Attention heads | 16 | checkpoint/config.yaml |
| Backbone | Attention head dimension | 64 | checkpoint/config.yaml |
| Backbone | Transformer layers | 16 | checkpoint/config.yaml |
| Backbone | Cross attention dimension | 768 | checkpoint/config.yaml |
| Post processor | Class | tsr.models.network_utils.TriplaneUpsampleNetwork | checkpoint/config.yaml |
| Post processor | Input / output channels | 1024 / 40 | checkpoint/config.yaml |
| Decoder | Class | tsr.models.network_utils.NeRFMLP | checkpoint/config.yaml |
| Decoder | Input channels | 120 (3 x 40) | checkpoint/config.yaml |
| Decoder | Hidden neurons | 64 | checkpoint/config.yaml |
| Decoder | Hidden layers | 9 | checkpoint/config.yaml |
| Decoder | Activation | silu | checkpoint/config.yaml |
| Renderer | Class | tsr.models.nerf_renderer.TriplaneNeRFRenderer | checkpoint/config.yaml |
| Renderer | Radius | 0.87 | checkpoint/config.yaml |
| Renderer | Feature reduction | concat | checkpoint/config.yaml |
| Renderer | Density activation | exp | checkpoint/config.yaml |
| Renderer | Density bias | -1.0 | checkpoint/config.yaml |
| Renderer | Samples per ray | 128 | checkpoint/config.yaml |
| Inference | Device | cuda:0 by default; fallback to CPU if CUDA unavailable | run.py |
| Inference | Chunk size | 49152 code default | run.py |
| Inference | Marching cubes resolution | 256 | run.py |
| Inference | Background removal | Enabled by default; disabled only with --no-remove-bg | run.py |
| Inference | Foreground ratio | 0.65 code default | run.py |
| Inference | Output directory | output_demo/ code default | run.py |
| Inference | Model save format | obj default, glb optional | run.py |
| Inference | Rendering | Disabled by default; --render saves video/images | run.py |
| Inference | Render number of views | 30 code default; run.sh example uses 72 | run.py and run.sh |

# Table S4. SF3D Default Configuration

| **Category** | **Parameter** | **Default value / setting** | **Evidence** |
| --- | --- | --- | --- |
| General | Official pretrained model | stabilityai/stable-fast-3d | run.py |
| General | Model type | Transformer image to 3D model | HF model card |
| Input | Expected input size | 512 x 512 pixels | HF model card |
| Input | Supported inputs in run.py | Image path(s) or folder | run.py |
| Preprocessing | Background removal | Enabled by default using rembg | run.py |
| Preprocessing | Foreground ratio | 0.85 | run.py |
| Inference | Device | get_device() default; cuda, mps, or cpu accepted | run.py |
| Inference | Batch size | 1 | run.py |
| Inference | Autocast precision | bfloat16 on CUDA | run.py |
| Output | Texture atlas resolution | 1024 | run.py |
| Output | Remesh option | none by default; triangle and quad optional | run.py and README |
| Output | Target vertex count | -1, no reduction | run.py |
| Output | Output directory | output/ | run.py |
| Output | Mesh format | GLB file with normals | run.py |
| Performance | Default memory note | About 6 GB VRAM for single image input | README |
| Model behavior | Geometry and texture | UV unwrapped textured mesh; material parameters including roughness and metallic | HF model card |
| Model behavior | Delighting | Delighting step is performed for downstream asset usage | HF model card |
| Source limitation | Full config.yaml | Gated HF file; not publicly readable without model access approval | HF file listing/model card |

# Table S5. SPAR3D Default Configuration

| **Category** | **Parameter** | **Default value / setting** | **Evidence** |
| --- | --- | --- | --- |
| General | Official pretrained model | stabilityai/stable-point-aware-3d | run.py |
| General | Model type | Transformer image to 3D model | HF model card |
| General | Technical feature | Point cloud conditioning to improve backside modelling | README and HF model card |
| Input | Expected input size | 512 x 512 pixels | HF model card |
| Input | Supported inputs in run.py | Image path(s) or folder | run.py |
| Preprocessing | Background removal | Enabled by default using transparent_background Remover | run.py |
| Preprocessing | Foreground ratio | 1.3 code default | run.py |
| Inference | Device | get_device() default; cuda, mps, or cpu accepted | run.py |
| Inference | Batch size | 1 | run.py |
| Inference | Low VRAM mode | False by default; optional --low-vram-mode | run.py |
| Inference | VRAM note | 10.5 GB default; low VRAM mode about 7 GB but slower | README and run.py help |
| Inference | Autocast precision | bfloat16 on CUDA | run.py |
| Output | Texture atlas resolution | 1024 | run.py |
| Output | Remesh option | none by default; triangle and quad optional when dependencies available | run.py |
| Output | Reduction count type | keep by default | run.py |
| Output | Target count | 2000 default but ignored when reduction_count_type is keep | run.py |
| Output | Mesh format | mesh.glb with normals | run.py |
| Output | Intermediate point cloud | points.ply exported because return_points=True | run.py |
| Output | Output directory | output/ | run.py |
| Model behavior | Material prediction | Predicts material parameters such as roughness and metallic | HF model card |
| Source limitation | Full config.yaml | Gated HF file; not publicly readable without model access approval | HF model card |

# Table S6. TRELLIS.2 Default Configuration

| **Category** | **Parameter** | **Default value / setting** | **Evidence** |
| --- | --- | --- | --- |
| General | Official pretrained model | microsoft/TRELLIS.2-4B | README and example.py |
| General | Parameter count | 4 billion | README and HF model card |
| General | Representation | O Voxel field free sparse voxel structure | README |
| General | VAE | Sparse 3D VAE with 16x spatial downsampling | README |
| General | Resolution range | 512^3 to 1536^3 | README and HF model card |
| Runtime | Minimum GPU memory stated by repo | NVIDIA GPU with at least 24 GB memory | README |
| Runtime | Tested GPUs | A100 and H100 | README |
| Runtime | Python version | 3.8 or higher | README |
| Runtime | Recommended CUDA toolkit | 12.4 | README |
| Usage | Pipeline class | Trellis2ImageTo3DPipeline | README and example.py |
| Usage | Model loading | from_pretrained("microsoft/TRELLIS.2-4B") | example.py |
| Usage | Input | RGBA/PIL image; app recommends alpha masked foreground object | app.py |
| Generation | Resolution UI options | 512, 1024, 1536; default 1024 | app.py |
| Generation | Seed | 0 by default; randomize_seed True in app | app.py |
| Stage 1 Sparse structure | Guidance strength | 7.5 | app.py |
| Stage 1 Sparse structure | Guidance rescale | 0.7 | app.py |
| Stage 1 Sparse structure | Sampling steps | 12 | app.py |
| Stage 1 Sparse structure | Rescale T | 5.0 | app.py |
| Stage 2 Shape | Guidance strength | 7.5 | app.py |
| Stage 2 Shape | Guidance rescale | 0.5 | app.py |
| Stage 2 Shape | Sampling steps | 12 | app.py |
| Stage 2 Shape | Rescale T | 3.0 | app.py |
| Stage 3 Material | Guidance strength | 1.0 | app.py |
| Stage 3 Material | Guidance rescale | 0.0 | app.py |
| Stage 3 Material | Sampling steps | 12 | app.py |
| Stage 3 Material | Rescale T | 3.0 | app.py |
| Preview rendering | Snapshot rendering | resolution 1024, radius 2, FOV 36, nviews = STEPS | app.py |
| Export | AABB | [[-0.5,-0.5,-0.5],[0.5,0.5,0.5]] | example.py and app.py |
| Export | Decimation target | 500000 in app UI; 1000000 in minimal example | app.py and example.py |
| Export | Texture size | 2048 in app UI; 4096 in minimal example | app.py and example.py |
| Export | Remesh | True | example.py and app.py |
| Export | Remesh band | 1 | example.py and app.py |
| Export | Remesh project | 0 | example.py and app.py |
| Export | GLB export | extension_webp=True | example.py and app.py |

# Source URLs Used for Parameter Extraction

Direct3D GitHub README: https://github.com/DreamTechAI/Direct3D

Direct3D HF config: https://huggingface.co/DreamTechAI/Direct3D/blob/main/config.yaml

Real3D GitHub README: https://github.com/hwjiang1510/Real3D

Real3D checkpoint config: https://github.com/hwjiang1510/Real3D/blob/main/checkpoint/config.yaml

Real3D run.py: https://github.com/hwjiang1510/Real3D/blob/main/run.py

SF3D GitHub README: https://github.com/Stability-AI/stable-fast-3d

SF3D run.py: https://github.com/Stability-AI/stable-fast-3d/blob/main/run.py

SF3D HF model card: https://huggingface.co/stabilityai/stable-fast-3d

SPAR3D GitHub README: https://github.com/Stability-AI/stable-point-aware-3d

SPAR3D run.py: https://github.com/Stability-AI/stable-point-aware-3d/blob/main/run.py

SPAR3D HF model card: https://huggingface.co/stabilityai/stable-point-aware-3d

TRELLIS.2 GitHub README: https://github.com/microsoft/TRELLIS.2

TRELLIS.2 example.py: https://github.com/microsoft/TRELLIS.2/blob/main/example.py

TRELLIS.2 app.py: https://github.com/microsoft/TRELLIS.2/blob/main/app.py

TRELLIS.2 HF model card: https://huggingface.co/microsoft/TRELLIS.2-4B

**Table S7. System Configuration.**

| Environment | Type |
| --- | --- |
| Hardware | CPU:Intel(R) Xeon(R) Gold 5220 CPU @ 2.20GHz |
| GPU: Tesla V100S*2 |
| RAM: 64 GB |
| VRAM: 32 GB*2 |
| Software | OS: Ubuntu 22.04 |
| CUDA: 11.3 |
| Python: 3.10 |
